# Supplementary material for: Flexible, Transparent and Conductive Metal Mesh Films with Ultra-High FoM for Stretchable Heating and Electromagnetic Interference Shielding
Source: PubMed Central journal article supplement (PMC10803711; doi:10.1007/s40820-023-01295-z), 2024-01-22
Supplement: 40820_2023_1295_MOESM1_ESM.pdf [file 40820_2023_1295_MOESM1_ESM.pdf]

Supporting Information for

# **Flexible, Transparent and Conductive Metal Mesh Films with Ultra-High FoM for Stretchable Heating and Electromagnetic Interference Shielding**

Zibo Chen<sup>1, #</sup>, Shaodian Yang<sup>1, #</sup>, Junhua Huang<sup>1</sup>, Yifan Gu<sup>1</sup>, Weibo Huang<sup>1</sup>, Shaoyong Liu<sup>1</sup>, Zhiqiang Lin<sup>2</sup>, Zhiping Zeng<sup>3</sup>, Yougen Hu<sup>2</sup>, Zimin Chen<sup>1</sup>, Boru Yang<sup>1, \*</sup>, and Xuchun Gui<sup>1, \*</sup>

<sup>1</sup> State Key Laboratory of Optoelectronic Materials and Technologies, School of Electronics and Information Technology, Sun Yat-sen University, Guangzhou 510275, P. R. China

<sup>2</sup> Guangdong Provincial Key Laboratory of Materials for High Density Electronic Packing, Shenzhen Institutes of Advanced Technology, Chinese Academy of Sciences, Shenzhen, Guangdong 518055, P. R. China

<sup>3</sup> School of Materials Science and Engineering, Sun Yat-sen University, Guangzhou 510275, P. R. China

# Zibo Chen and Shaodian Yang contributed equally to this work.

\*Corresponding authors. E-mail: [guixch@mail.sysu.edu.cn](mailto:guixch@mail.sysu.edu.cn) (Xuchun Gui); [yangboru@mail.sysu.edu.cn](mailto:yangboru@mail.sysu.edu.cn) (Boru Yang)

## **Supplementary Figures and Tables**

The total EMI shielding effectiveness ( $SE_T$ ) is the sum of the absorption of electromagnetic energy ( $SE_A$ ), the reflection ( $SE_R$ ). Reflectivity ( $R$ ), absorptivity ( $A$ ), and transmissivity ( $T$ ) are determined based on the measured parameters including reflection ( $S_{11}$ ) and transmission ( $S_{12}$ ) parameters, the equations are as follows:

$$EMI SE_T = SE_A + SE_R \quad (S1)$$

$$R = |S_{11}^2| = |S_{22}^2| \quad (S2)$$

$$T = |S_{12}^2| = |S_{21}^2| \quad (S3)$$

$$A = 1 - R - T \quad (S4)$$

$$SE_T = -10 \log T = -20 \log S_{12} \quad (S5)$$

$$SE_R = -10 \log(1 - R) \quad (S6)$$

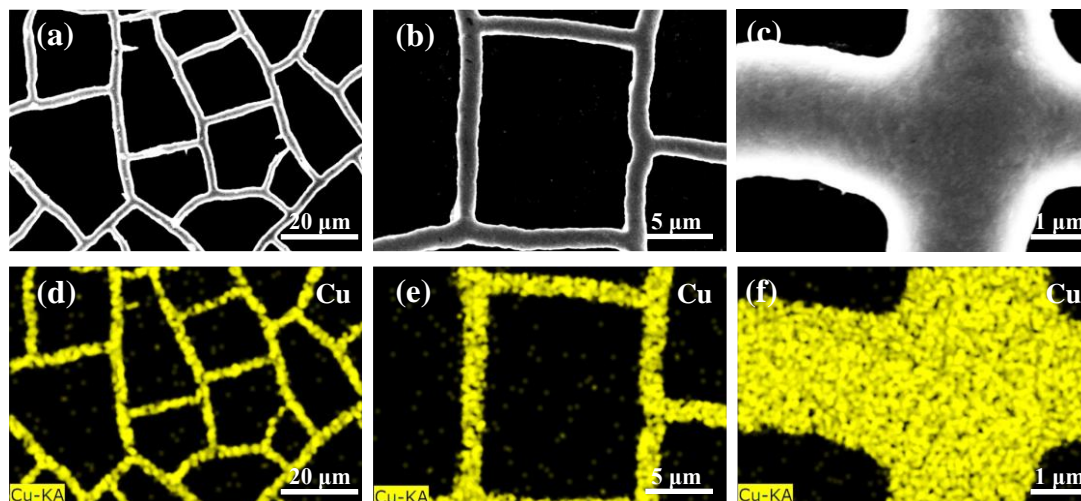

Fig. S1 a-c SEM images of Cu mesh. d-f Corresponding EDS mapping results

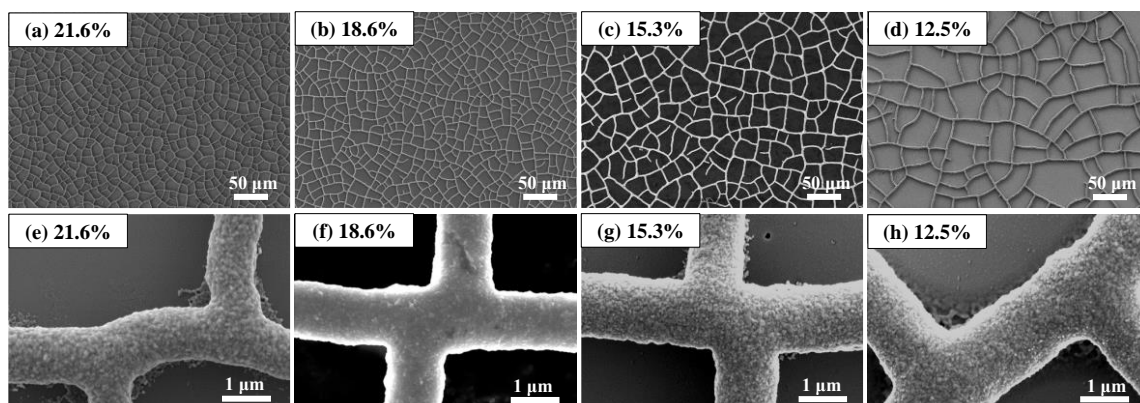

Fig. S2 SEM images of the Cu mesh films with different coverage ratios

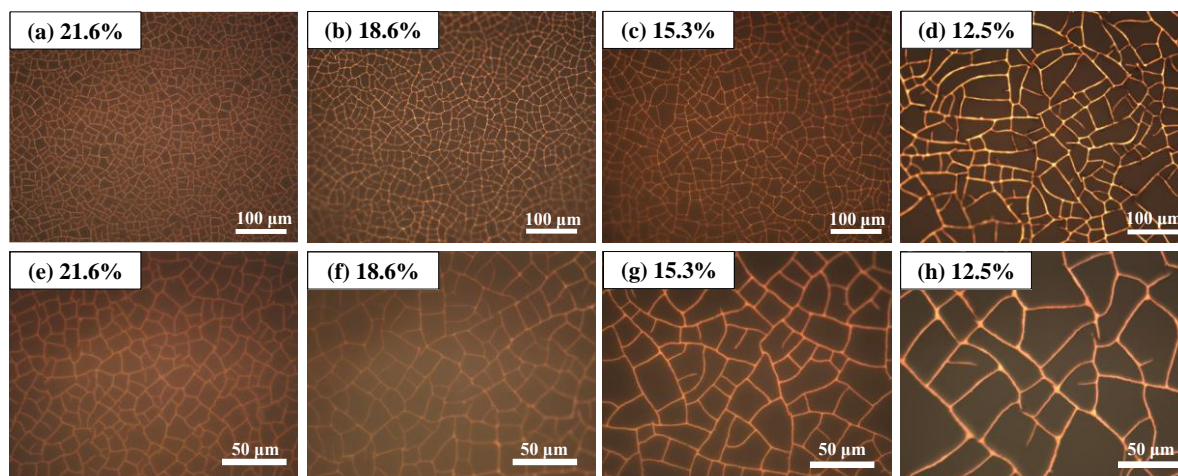

Fig. S3 OM images of the Cu mesh films with different coverage ratios

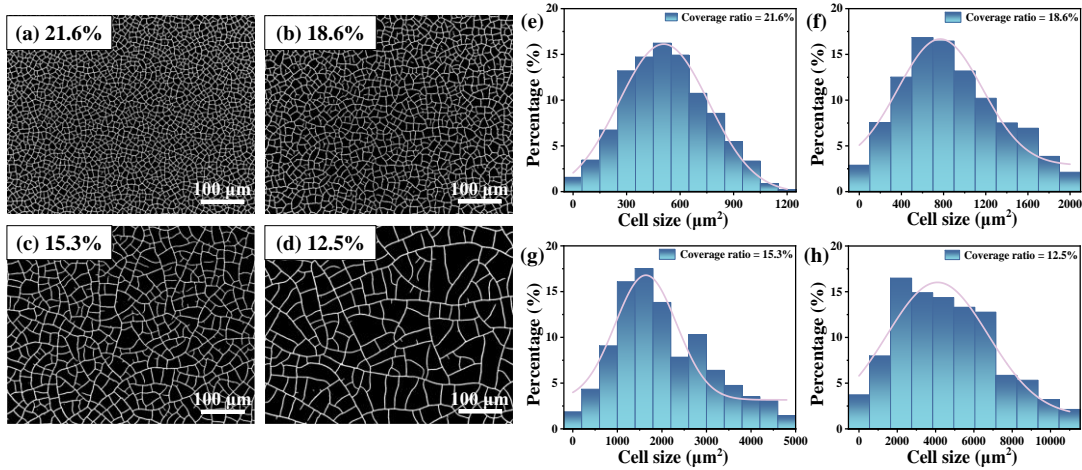

**Fig. S4 a-d** Images of the Cu meshes processed by image-J (The white areas represent Cu). **e-h** Cell size distributions of the Cu mesh with different coverage ratios

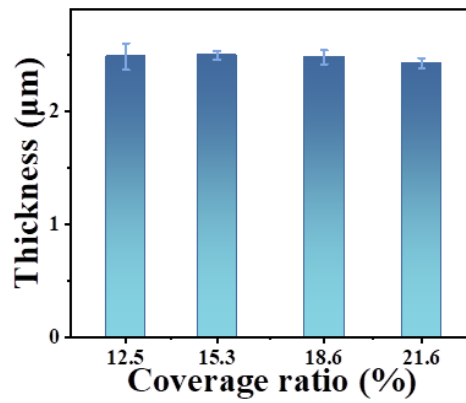

**Fig. S5** Thicknesses of the Cu mesh films with different coverage ratios

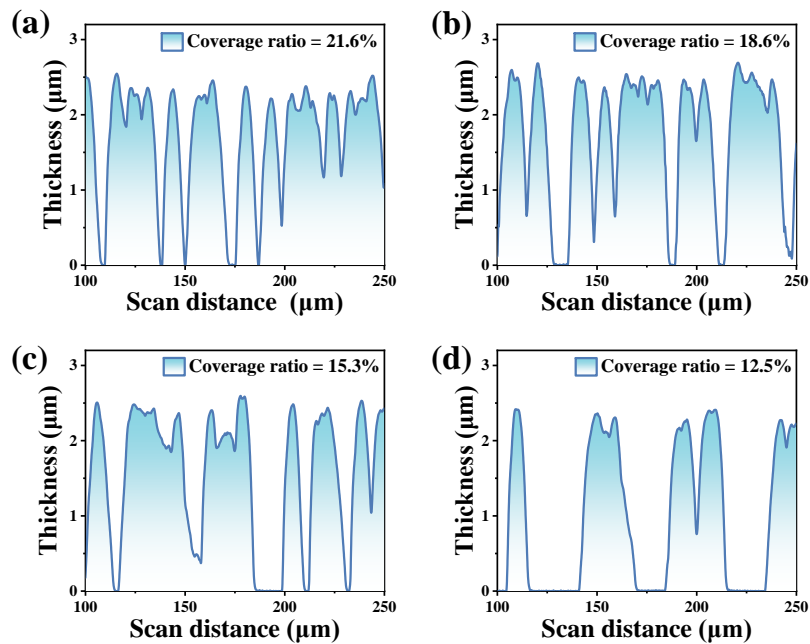

**Fig. S6** Thicknesses of Cu meshes with different coverage ratios measured by step profiler

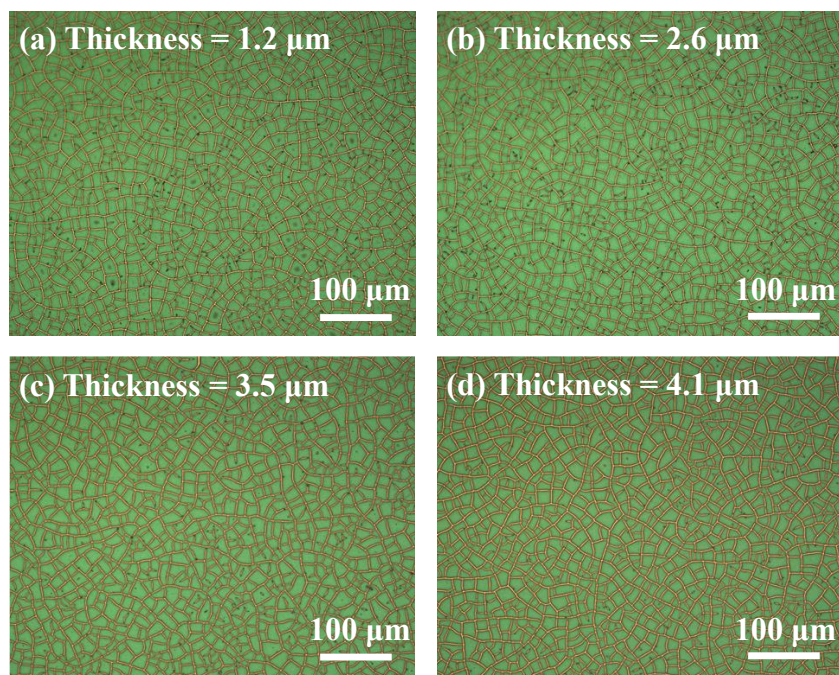

**Fig. S7** OM images of Cu meshes embedded in crackle templates at different thicknesses

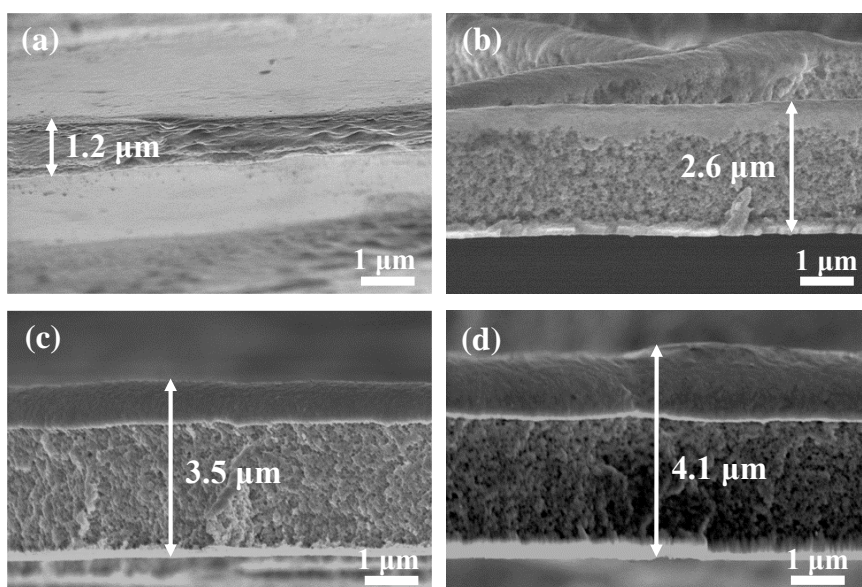

**Fig. S8** Cross-sectional SEM images of Cu mesh films at different thicknesses

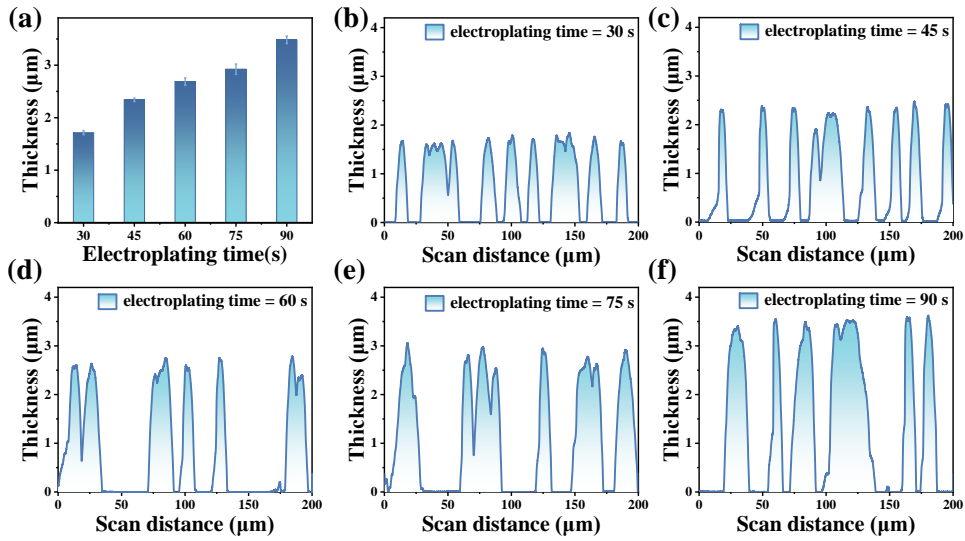

**Fig. S9** **a** Thicknesses of the Cu mesh films at different electroplating time. **b-f** Thickness of Cu mesh films with different electroplating time measured by step profiler

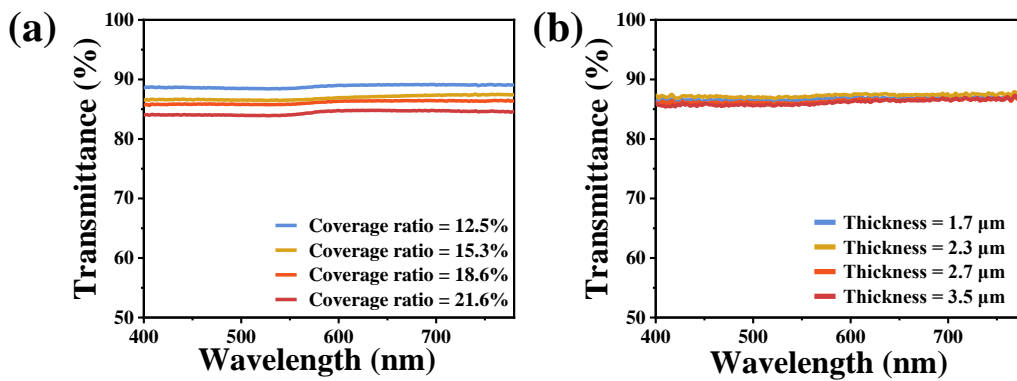

**Fig. S10** **a** Transmittance of Cu mesh films with different coverage ratios in visible spectrum. **b** Transmittance of Cu mesh films with different thicknesses in visible spectrum

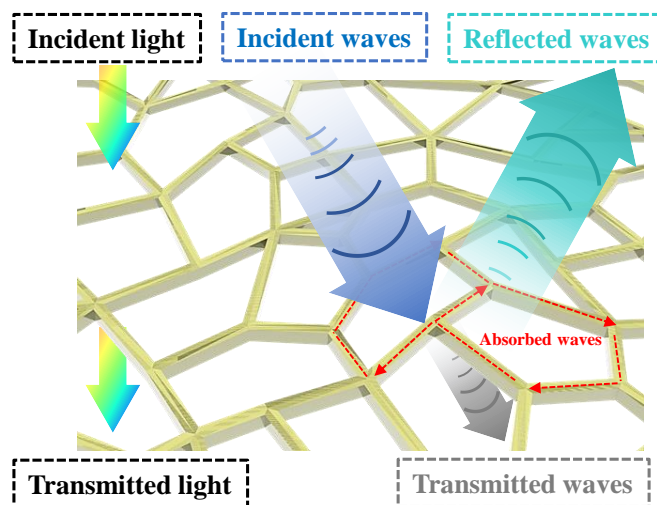

**Fig. S11** Schematic diagram of the shielding mechanism for the Cu mesh

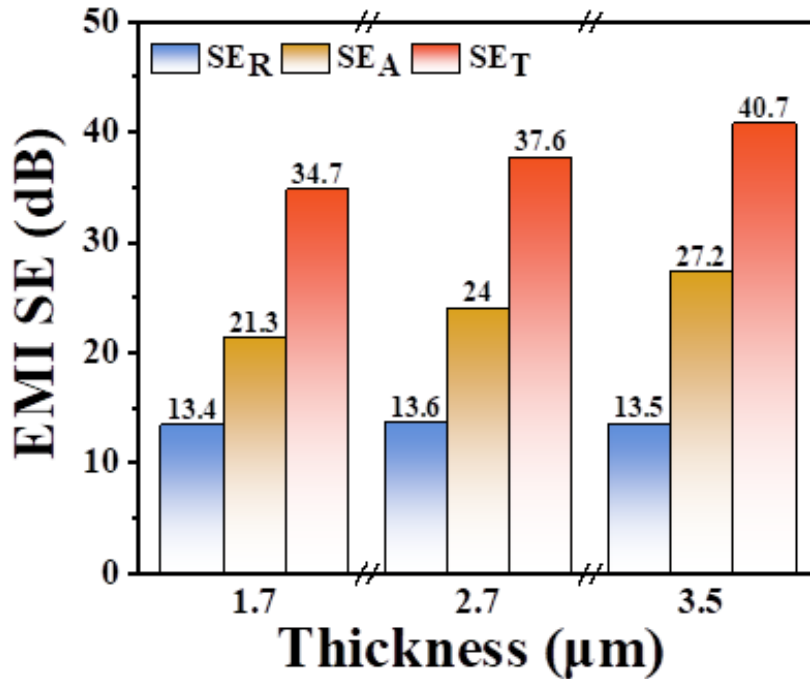

**Fig. S12** Contributions of the average EM reflection and absorption to the total EMI SE for Cu mesh films with different thicknesses

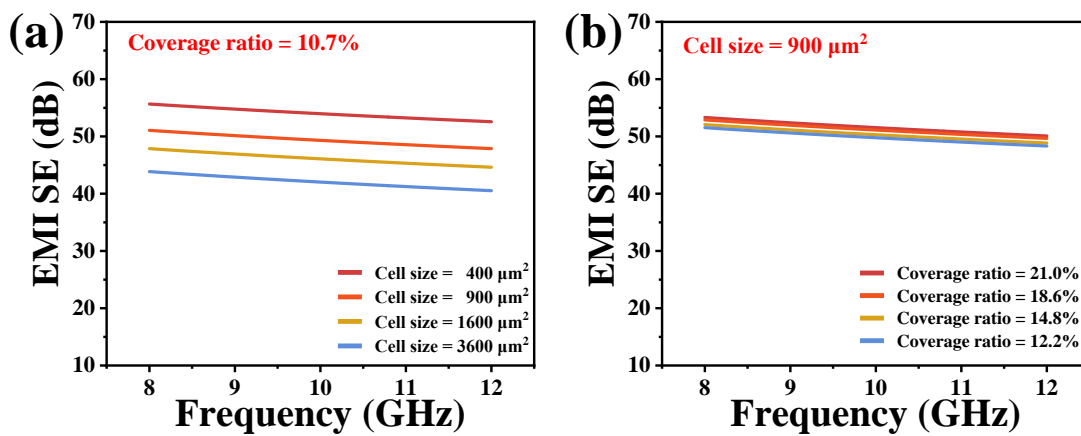

**Fig. S13 a** Total EMI SE of the Cu meshes (Coverage ratio = 10.7%) with different cell sizes in the X-band (8.2-12.4 GHz). **b** Total EMI SE of the Cu meshes (Cell size = 900 μm<sup>2</sup>) with different coverage ratios in the X-band (8.2-12.4 GHz)

The EMI SE within X-band of copper mesh film was simulated by CST studio suite. The conductivity of copper was set to  $5.98 \times 10^7$  S/m, and the permittivity of PDMS was set to 2.65. The unit area was set to 16,129 μm<sup>2</sup>, with a total area of all cell sizes set at 14,400 μm<sup>2</sup>, which means that all samples have a coverage ratio of around 10.7% and different cell sizes (Fig. S13a). In addition, the cell size was set to 900 μm<sup>2</sup>, with various coverage ratio by adjusting the line width of the copper (Fig. S13b).

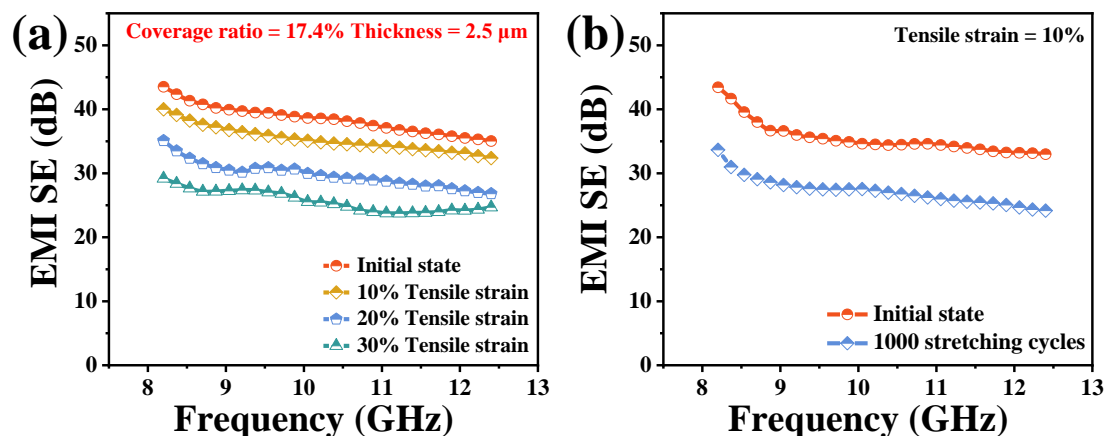

**Fig. S14** EMI shielding performance of the flexible Cu mesh films (Coverage ratio = 17.4%, thickness = 2.5 μm). **a** Total EMI SE of Cu mesh at initial state and various tensile strain (10%, 20% and 30%). **b** Total EMI SE of Cu mesh at initial state and after 1000 stretching cycles at 10% tensile strain

**Table S1** Parameters for Cu meshes of different coverage ratios

| Parameters                             | Coverage ratio |         |         |         |
|----------------------------------------|----------------|---------|---------|---------|
|                                        | 12.5%          | 15.3%   | 18.6%   | 21.6%   |
| Crackle lacquer concentration (%)      | 100            | 95      | 90      | 85      |
| Spin coating speed (rpm)               | 5000           | 5000    | 4500    | 4000    |
| Culture-dish size (cm <sup>2</sup> )   | 15 × 15        | 10 × 10 | 10 × 10 | 10 × 10 |
| Temperature (°C)                       | 35             | 35      | 35      | 35      |
| Electroplating time (s)                | 40             | 50      | 60      | 75      |
| Current density (mA cm <sup>-2</sup> ) | 20             | 20      | 20      | 20      |

**Table S2** Parameters for Cu meshes of different thicknesses

| Parameters                        | Thickness (μm) |      |      |      |
|-----------------------------------|----------------|------|------|------|
|                                   | 1.7            | 2.3  | 2.7  | 3.5  |
| Crackle lacquer concentration (%) | 95             | 95   | 95   | 95   |
| Spin coating speed (rpm)          | 5000           | 5000 | 5000 | 5000 |

|                                        |         |         |         |         |
|----------------------------------------|---------|---------|---------|---------|
| Culture-dish size (cm <sup>2</sup> )   | 10 × 10 | 10 × 10 | 10 × 10 | 10 × 10 |
| Temperature (°C)                       | 35      | 35      | 35      | 35      |
| Electroplating time (s)                | 30      | 45      | 60      | 90      |
| Current density (mA cm <sup>-2</sup> ) | 20      | 20      | 20      | 20      |

**Table S3** Comparison of sheet resistances, transmittances and method between TCFS reported in the literatures and this work

| Material      | Method                               | Sheet resistance (Ω/□) | Transmittance @550nm | FOM   | Refs. |
|---------------|--------------------------------------|------------------------|----------------------|-------|-------|
| ITO           | Drop-coating                         | 20                     | 82%                  | 90    | [1]   |
| AgNW          | Spin-coating                         | 20.7                   | 94.8%                | 337   | [2]   |
| AgNW/PSSNa    | Spin-coating                         | 10                     | 92%                  | 416   | [3]   |
| Graphene      | Roll-to-roll and wet chemical doping | 30                     | 90%                  | 116   | [4]   |
| Graphene/AgNW | CVD and Mayer rod coating            | 8                      | 94%                  | 750   | [5]   |
| CNT           | Spin-coating                         | 128                    | 90%                  | 27    | [6]   |
| MXene         | Blade-coating                        | 170                    | 89%                  | 18    | [7]   |
| PEDOT:PSS     | Spin-coating                         | 75                     | 86%                  | 32    | [8]   |
| Ag mesh       | UV lithography                       | 2.47                   | 90.3%                | 1458  | [9]   |
| Cu mesh/PU    | Imprinting and electroplating        | 0.15                   | 82.5%                | 12446 | [10]  |
| Metallic mesh | Self-forming and thermal evaporation | 2                      | 76%                  | 640   | [11]  |



|         |                                 |      |       |       |           |
|---------|---------------------------------|------|-------|-------|-----------|
| Cu mesh | Self-forming and electroplating | 0.18 | 85.8% | 13232 | This work |
|---------|---------------------------------|------|-------|-------|-----------|

**Table S4** Comparison of the EMI SE and transmittance of this work with other materials in the literatures

| Material                                      | Frequency (GHz) | Average EMI SE (dB) | Transmittance @550nm | Refs.     |
|-----------------------------------------------|-----------------|---------------------|----------------------|-----------|
| AgNW@rGO                                      | 8.2-12.4        | 35                  | 91%                  | [S12]     |
| CA/AgNW/PU                                    | 8.2-12.4        | 21                  | 92%                  | [S13]     |
| PES/AgNW                                      | 8.2-12.4        | 16                  | 85%                  | [S14]     |
| AgNW                                          | 1-18            | 30                  | 80%                  | [S15]     |
| GNS/AgNW                                      | 12-18           | 28                  | 78%                  | [S16]     |
| Ti <sub>3</sub> C <sub>2</sub> T <sub>x</sub> | 8.2-12.4        | 4                   | 75%                  | [S17]     |
| MXene grid/AgNW                               | 8.2-12.4        | 25                  | 81%                  | [S18]     |
| Ni mesh                                       | 8.2-12.4        | 36                  | 93%                  | [S19]     |
| Ag-Ni mesh                                    | 8.2-12.4        | 43                  | 83%                  | [S20]     |
| AgNW mesh                                     | 8.2-12.4        | 42                  | 67%                  | [S21]     |
| Cu mesh                                       | 12-18           | 24                  | 82%                  | [S22]     |
| Crackle template metal mesh                   | 12-18           | 30                  | 82%                  | [S23]     |
| Cu mesh                                       | 8.2-12.4        | 41                  | 85.8%                | This work |

### Supplementary References

- [S1] J. Y. Lee, S. T. Connor, Y. Cui, and P. Peumans, Solution-processed metal nanowire mesh transparent electrodes. *Nano Lett.* **8**, 689 (2008).  
<https://doi.org/10.1021/nl073296g>

- [S2] J. H. Seo, I. Hwang, H. D. Um, S. Lee, K. Lee et al., Cold isostatic-pressured silver nanowire electrodes for flexible organic solar cells via room-temperature processes. *Adv. Mater.* **29**, 1701479 (2017). <https://doi.org/10.1002/adma.201701479>
- [S3] Y. Sun, M. Chang, L. Meng, X. Wan, H. Gao et al., Flexible organic photovoltaics based on water-processed silver nanowire electrodes. *Nat. Electron.* **2**, 513 (2019). <https://doi.org/10.1038/s41928-019-0315-1>
- [S4] S. Bae, H. Kim, Y. Lee, X. Xu, J. S. Park et al., Roll-to-roll production of 30-inch graphene films for transparent electrodes. *Nat. Nanotechnol.* **5**, 574 (2010). <https://doi.org/10.1038/nnano.2010.132>
- [S5] B. Deng, P. C. Hsu, G. Chen, B. N. Chandrashekar, L. Liao et al., Roll-to-roll encapsulation of metal nanowires between graphene and plastic substrate for high-performance flexible transparent electrodes. *Nano Lett.* **15**, 4206 (2015). <https://doi.org/10.1021/acs.nanolett.5b01531>
- [S6] L. Yu, C. Shearer, and J. Shapter, Recent development of carbon nanotube transparent conductive films. *Chem. Rev.* **116**, 13413 (2016). <https://doi.org/10.1021/acs.chemrev.6b00179>
- [S7] T. Guo, D. Zhou, S. Deng, M. Jafarpour, J. Avaro et al., Rational design of  $\text{Ti}_3\text{C}_2\text{T}_x$  MXene inks for conductive, transparent films. *ACS Nano* **17**, 3737 (2023). <https://doi.org/10.1021/acsnano.2c11180>
- [S8] W. Song, X. Fan, B. Xu, F. Yan, H. Cui et al., All-solution-processed metal-oxide-free flexible organic solar cells with over 10% efficiency. *Adv. Mater.* **30**, 1800075 (2018). <https://doi.org/10.1002/adma.201800075>
- [S9] M. Li, M. Zarei, K. Mohammadi, S. B. Walker, M. LeMieux et al., Silver meshes for record-performance transparent electromagnetic interference shielding. *ACS Appl. Mater. Interfaces* **15**, 30591 (2023). <https://doi.org/10.1021/acsaami.3c02088>
- [S10] X. Chen, Y. Yin, W. Yuan, S. Nie, Y. Lin et al., Transparent thermotherapeutic skin patch based on highly conductive and stretchable copper mesh heater. *Adv. Electron. Mater.* **7**, 2100611 (2021). <https://doi.org/10.1002/aelm.202100611>
- [S11] B. Han, K. Pei, Y. Huang, X. Zhang, Q. Rong et al., Uniform self-forming metallic network as a high-performance transparent conductive electrode. *Adv. Mater.* **26**, 873 (2014). <https://doi.org/10.1002/adma.201302950>
- [S12] Y. Yang, S. Chen, W. Li, P. Li, J. Ma et al., Reduced graphene oxide conformally wrapped silver nanowire networks for flexible transparent heating and electromagnetic interference shielding. *ACS Nano* **14**, 8754 (2020). <https://doi.org/10.1021/acsnano.0c03337>
- [S13] L. C. Jia, D. X. Yan, X. Liu, R. Ma, H. Y. Wu et al., Highly efficient and reliable transparent electromagnetic interference shielding film. *ACS Appl. Mater. Interfaces* **10**, 11941 (2018) <https://doi.org/10.1021/acsaami.8b00492>

- [S14] M. Hu, J. Gao, Y. Dong, K. Li, G. Shan et al., Flexible transparent pes/silver nanowires/pet sandwich-structured film for high-efficiency electromagnetic interference shielding. *Langmuir* **28**, 7101 (2012). <https://doi.org/10.1021/la300720y>
- [S15] X. Zhang, Y. Zhong, and Y. Yan, Electrical, mechanical, and electromagnetic shielding properties of silver nanowire-based transparent conductive films. *Phys. Status Solidi Appl. Mater. Sci.* **215**, 1800014 (2018). <https://doi.org/10.1002/pssa.201800014>
- [S16] N. Zhang, Z. Wang, R. Song, Q. Wang, H. Chen et al., Flexible and transparent graphene/silver-nanowires composite film for high electromagnetic interference shielding effectiveness. *Sci. Bull.* **64**, 540 (2019). <https://doi.org/10.1016/j.scib.2019.03.028>
- [S17] T. Yun, H. Kim, A. Iqbal, Y. S. Cho, G. S. Lee et al., Electromagnetic shielding of monolayer MXene assemblies. *Adv. Mater.* **32**, 1906769 (2020). <https://doi.org/10.1002/adma.201906769>
- [S18] M. Jin, W. Chen, L. X. Liu, H. Bin Zhang, L. Ye et al., Transparent, conductive and flexible MXene grid/silver nanowire hierarchical films for high-performance electromagnetic interference shielding. *J. Mater. Chem. A* **10**, 14364 (2022). <https://doi.org/10.1039/d2ta03689d>
- [S19] Z. Jiang, W. Huang, L. Chen, and Y. Liu, Ultrathin, lightweight, and freestanding metallic mesh for transparent electromagnetic interference shielding. *Opt. Express* **27**, 24194 (2019). <https://doi.org/10.1364/oe.27.024194>
- [S20] S. Shen, S.-Y. Chen, D.-Y. Zhang, and Y.-H. Liu, High-performance composite Ag-Ni mesh based flexible transparent conductive film as multifunctional devices. *Opt. Express* **26**, 27545 (2018). <https://doi.org/10.1364/oe.26.027545>
- [S21] J. Gu, S. Hu, H. Ji, H. Feng, W. Zhao et al., Multi-layer silver nanowire/polyethylene terephthalate mesh structure for highly efficient transparent electromagnetic interference shielding. *Nanotechnology* **31**, 185303 (2020). <https://doi.org/10.1088/1361-6528/ab6d9d>
- [S22] Y. Han, H. Zhong, N. Liu, Y. Liu, J. Lin et al., In situ surface oxidized copper mesh electrodes for high-performance transparent electrical heating and electromagnetic interference shielding. *Adv. Electron. Mater.* **4**, 1800156 (2018) <https://doi.org/10.1002/aelm.201800156>
- [S23] Y. Han, J. Lin, Y. Liu, H. Fu, Y. Ma et al., Crackle template based metallic mesh with highly homogeneous light transmission for high-performance transparent EMI shielding. *Sci. Rep.* **6**, 25601 (2016) <https://doi.org/10.1038/srep25601>
